# Supplementary material for: A novel 8-hydroxyquinoline-pyrazole based highly sensitive and selective Al(iii) sensor in a purely aqueous medium with intracellular application: experimental and computational studies
Source: Royal Society of Chemistry journal article supplement (doi:10.1039/c5nj03153b), 2016-01-01
Supplement: c5nj03153b1.pdf [file c5nj03153b1.pdf]

## A novel 8-hydroxyquinoline—pyazole based highly sensitive and selective Al(III) sensor in purely aqueous medium with intracellular application: experimental and computational studies†

Abu Saleh Musha Islam<sup>a</sup>, Rahul Bhowmick<sup>a</sup>, Hasan Mohammad<sup>a</sup>, Atul Katarkar<sup>b</sup>, Keya Chaudhuri<sup>b</sup> and Mahammad Ali\*<sup>a</sup>

<sup>a</sup>Department of Chemistry, Jadavpur University, Kolkata 700 032, India, Fax: 91-33-2414-6223, E-mail: [m.ali2062@yahoo.com](mailto:m.ali2062@yahoo.com) and [mali@chemistry.jdvu.ac.in](mailto:mali@chemistry.jdvu.ac.in)

<sup>b</sup>Molecular & Human Genetics Division, CSIR-Indian Institute of Chemical Biology, 4 Raja S.C. Mallick Road, Kolkata-700032, India

| No. | Content.                                                                                                                                      | Fig.No. |
|-----|-----------------------------------------------------------------------------------------------------------------------------------------------|---------|
| 1.  | <sup>1</sup> H-NMR spectrum of L <sup>1</sup> in DMSO-d <sub>6</sub> .                                                                        | Fig.S1  |
| 2.  | <sup>1</sup> H-NMR spectrum of HL <sup>2</sup> in CDCl <sub>3</sub> .                                                                         | Fig.S2  |
| 3.  | <sup>1</sup> H-NMR spectrum of H <sub>2</sub> L <sup>3</sup> (8Q-NH-Pyz) in DMSO-d <sub>6</sub> .                                             | Fig.S3  |
| 4.  | <sup>13</sup> C-NMR spectrum of H <sub>2</sub> L <sup>3</sup> (8Q-NH-Pyz) in DMSO-d <sub>6</sub> .                                            | Fig.S4  |
| 5.  | Mass spectrum of H <sub>2</sub> L <sup>3</sup> (8Q-NH-Pyz) in MeOH.                                                                           | Fig.S5  |
| 6.  | IR spectrum of ligand H <sub>2</sub> L <sup>3</sup> (8Q-NH-Pyz).                                                                              | Fig.S6  |
| 7.  | Plot of F.I vs [Al <sup>3+</sup> ].                                                                                                           | Fig.S7  |
| 8.  | LOD of Al <sup>3+</sup> .                                                                                                                     | Fig.S8  |
| 9.  | Job's plot for Al <sup>3+</sup> .                                                                                                             | Fig.S9  |
| 10. | Mass spectra of [(8Q-NH-Pyz) - 2H + Al <sup>3+</sup> + H <sub>2</sub> O] <sup>+</sup> or Al(L <sup>3</sup> )(H <sub>2</sub> O) <sup>+</sup> . | Fig.S10 |
| 11. | Frontier molecular orbitals involved in the UV-Vis absorption of ligand 8Q-NH-Pyz (H <sub>2</sub> L <sup>3</sup> ).                           | Fig.S11 |
| 12. | Frontier molecular orbitals involved in the UV-Vis absorption of complex [Al(L <sup>3</sup> )(H <sub>2</sub> O)] <sup>+</sup> .               | Fig.S12 |
| 13. | MTT assay of ligand <b>8Q-NH-Pyz</b> .                                                                                                        | Fig.S13 |

|     |                                                                                                                                                                                                          |          |
|-----|----------------------------------------------------------------------------------------------------------------------------------------------------------------------------------------------------------|----------|
| 14. | List of some non-dye-based Al <sup>3+</sup> sensors.                                                                                                                                                     | Table S1 |
| 15. | List of some selected bond lengths of 8Q-NH-Pyz in the ground state calculated at B3LYP Levels.                                                                                                          | Table S2 |
| 16. | Some selected geometrical parameters for [Al(L <sup>3</sup> )(H <sub>2</sub> O)] <sup>+</sup> (1) complex in the ground state calculated at B3LYP Levels.                                                | Table S3 |
| 17. | Vertical excitation energies and oscillator strengths ( $f_{\text{cal}}$ ) of some low-lying excited singlet states obtained from TDDFT// B3LYP/6-31+G calculations of 8Q-NH-Pyz.                        | Table S4 |
| 18. | Vertical excitation energies and oscillator strengths ( $f_{\text{cal}}$ ) of some low-lying excited singlets obtained from TDDFT// B3LYP/6-31+G calculations of 8Q-NH-Pyz-Al <sup>3+</sup> complex (1). | Table S5 |

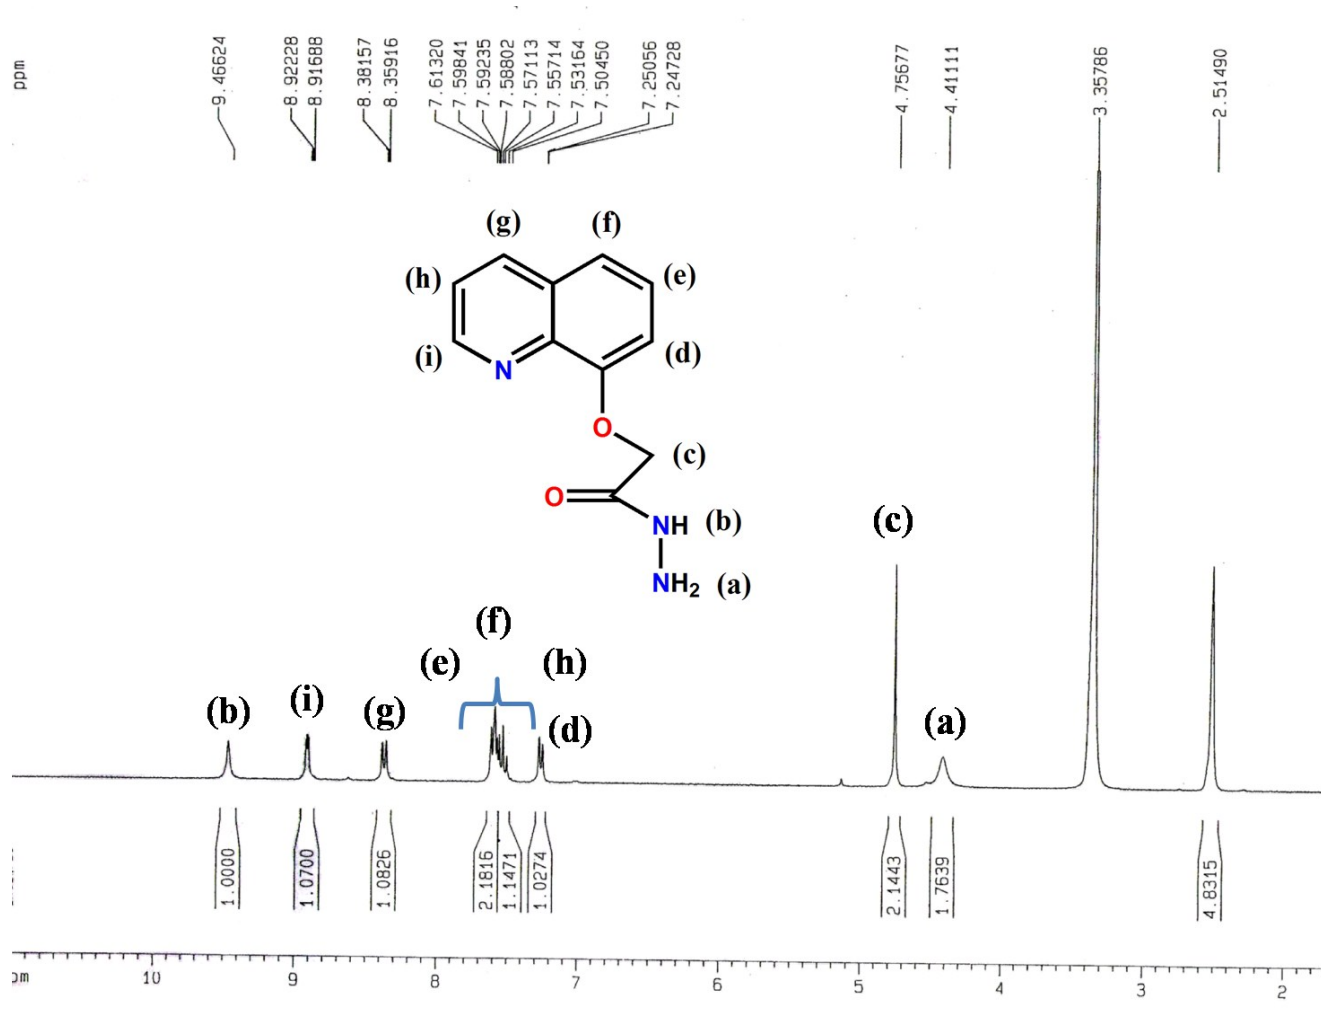

**Fig. S1.**  $^1\text{H-NMR}$  spectrum of  $L^1$  in  $\text{DMSO-d}_6$ .

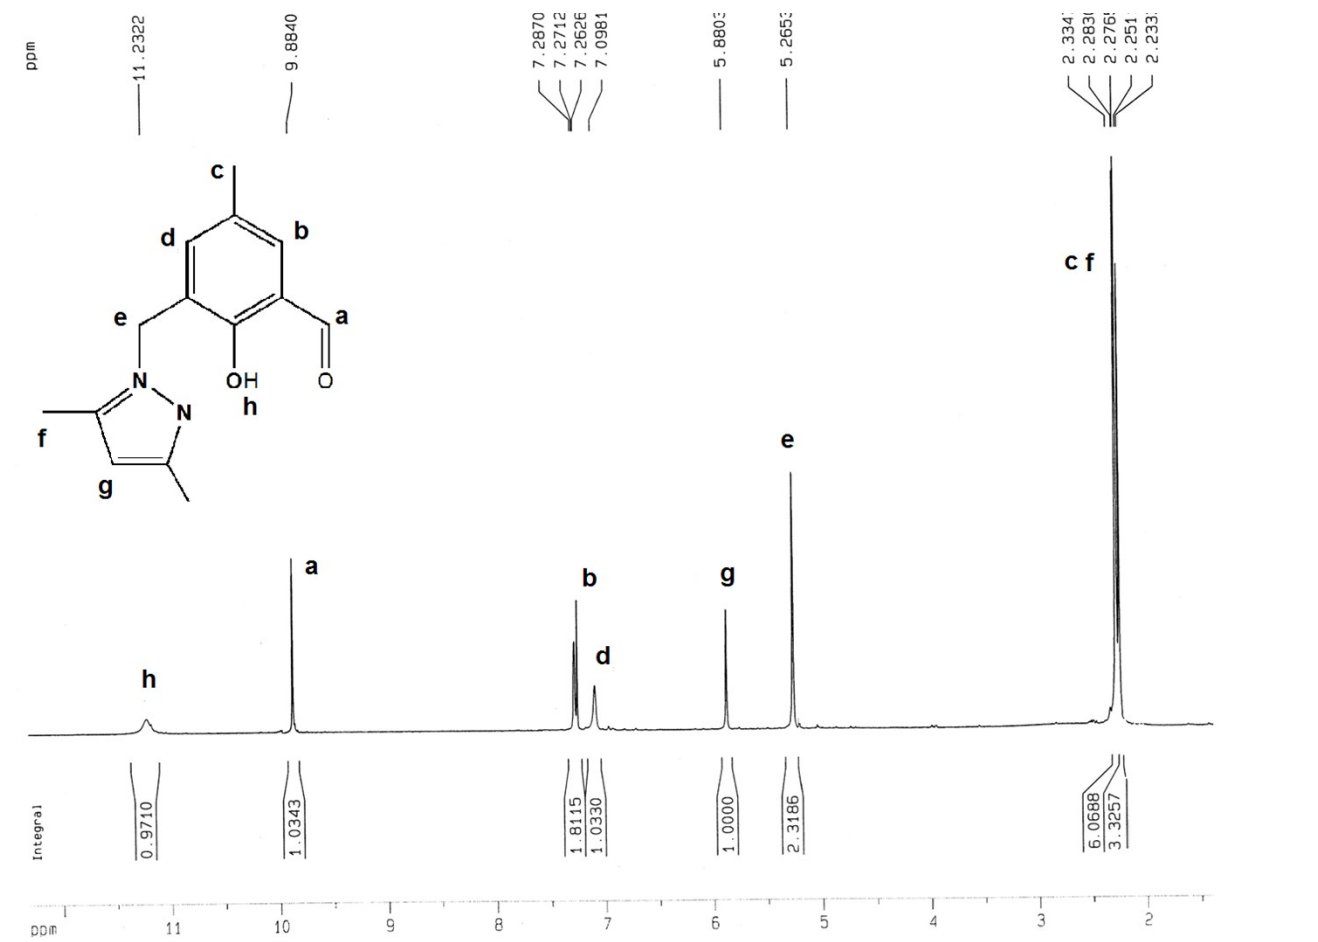

**Fig.S2.** <sup>1</sup>H-NMR spectrum of HL<sup>2</sup> in CDCl<sub>3</sub>.

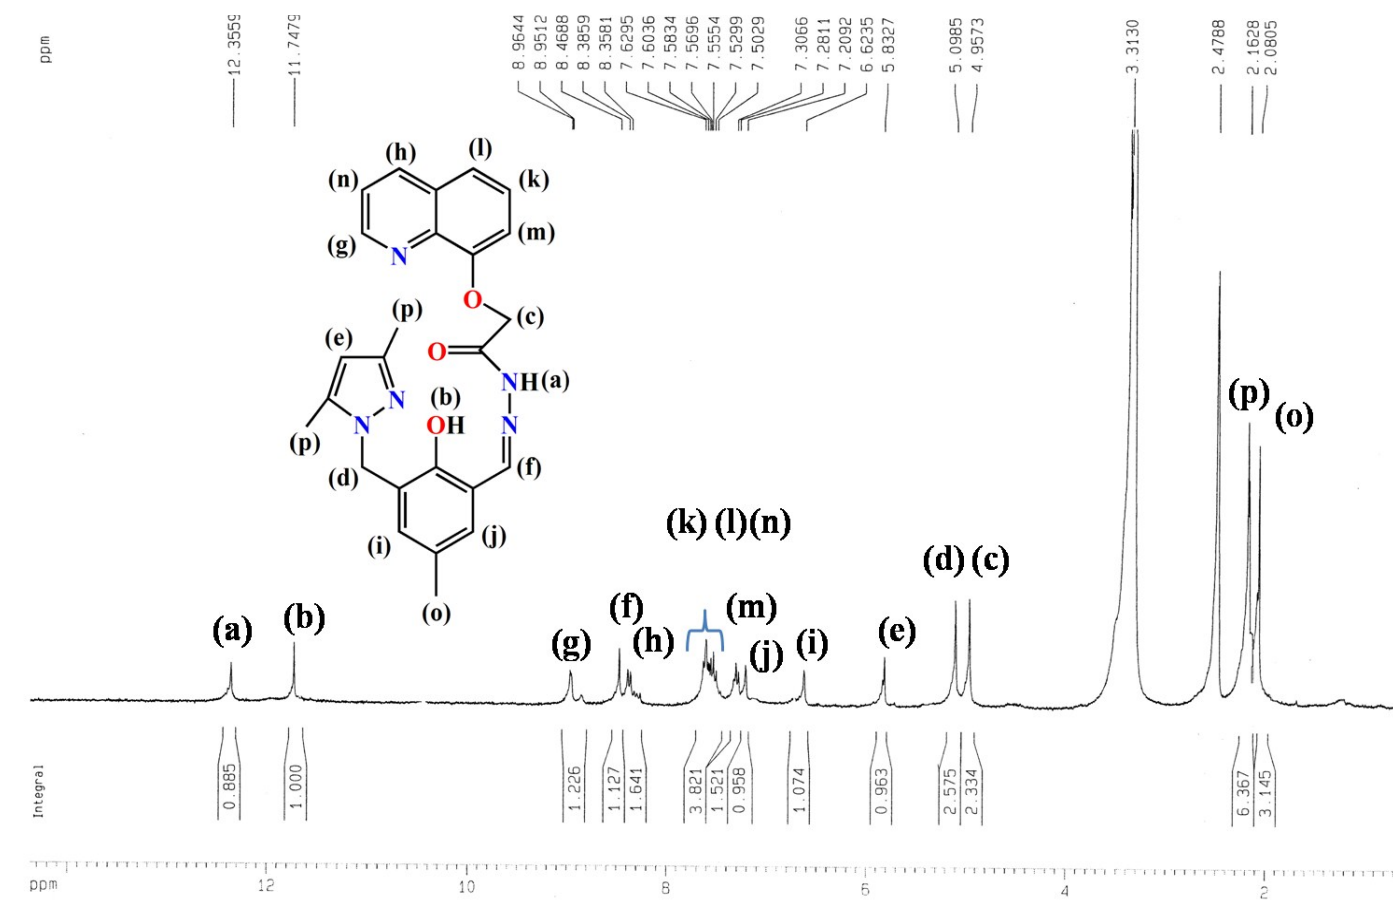

**Fig.S3.**  $^1H$ -NMR spectrum of  $H_2L^3$  in DMSO- $d_6$ .

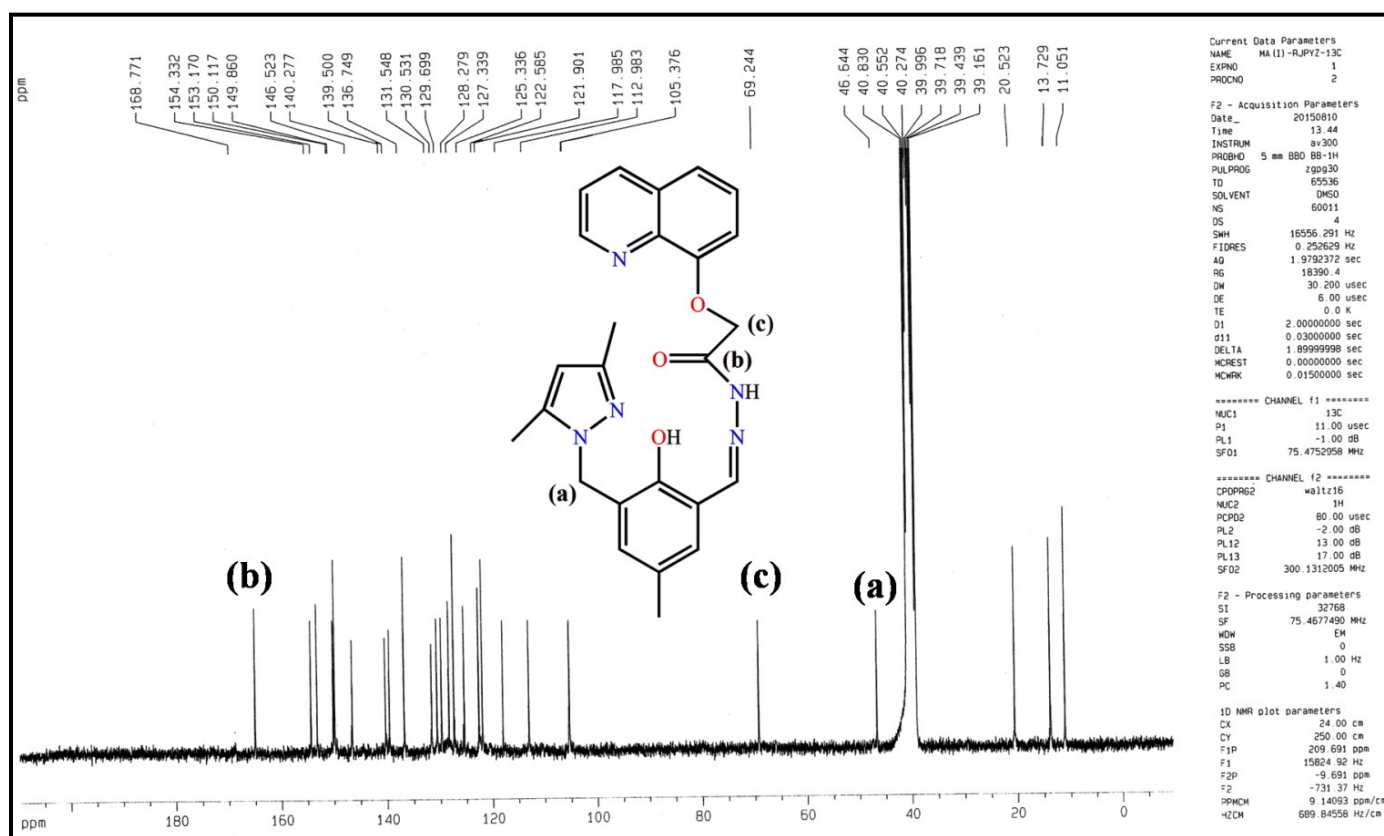

**Fig. S4.** <sup>13</sup>C-NMR spectrum of H<sub>2</sub>L<sup>3</sup> in DMSO-d<sub>6</sub>

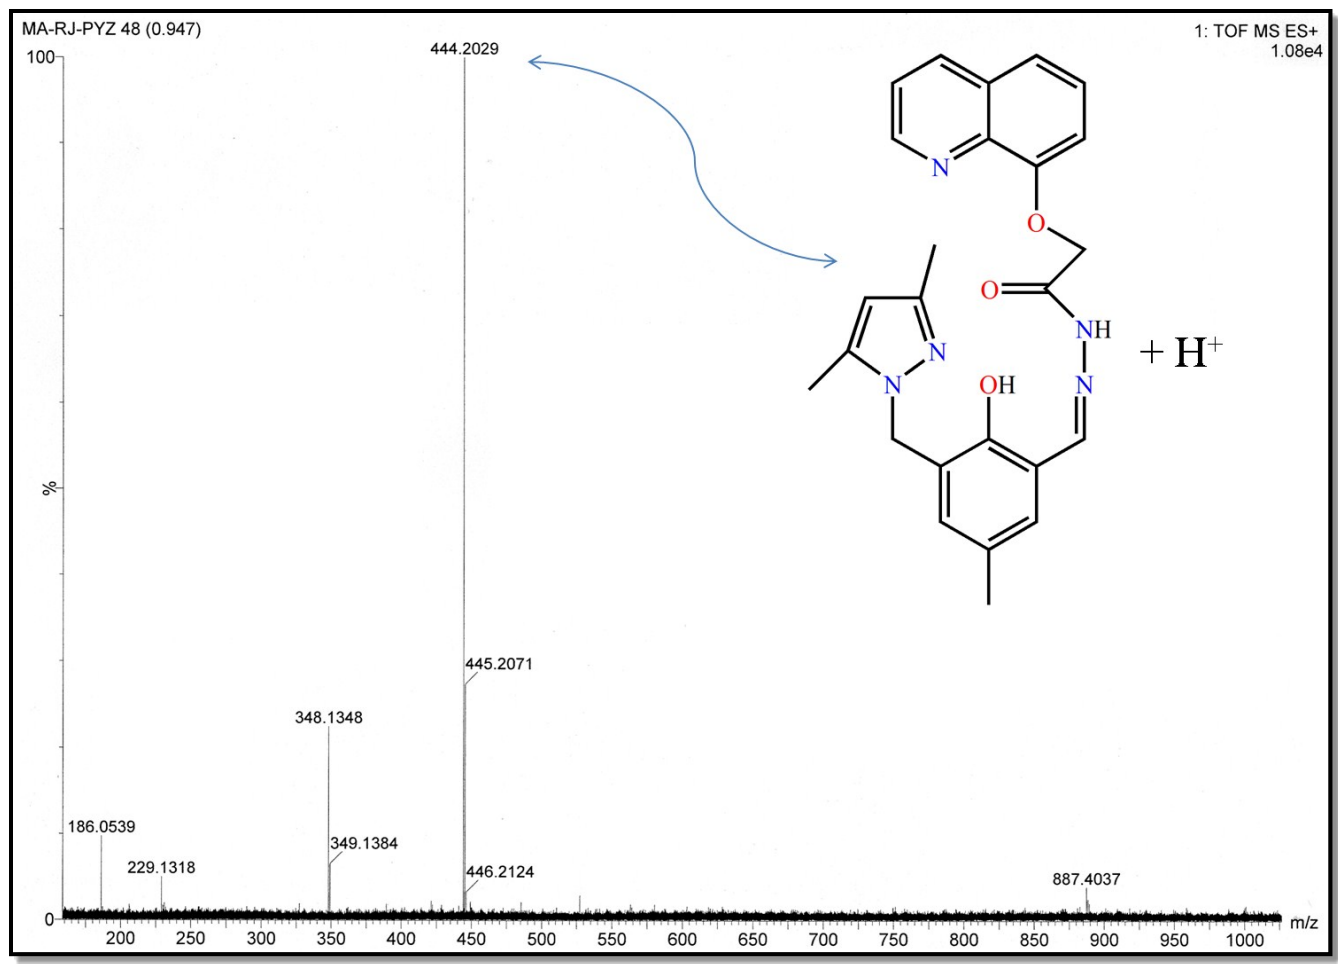

**Fig. S5.** Mass spectrum of 8Q-NH-Pyz in MeOH.

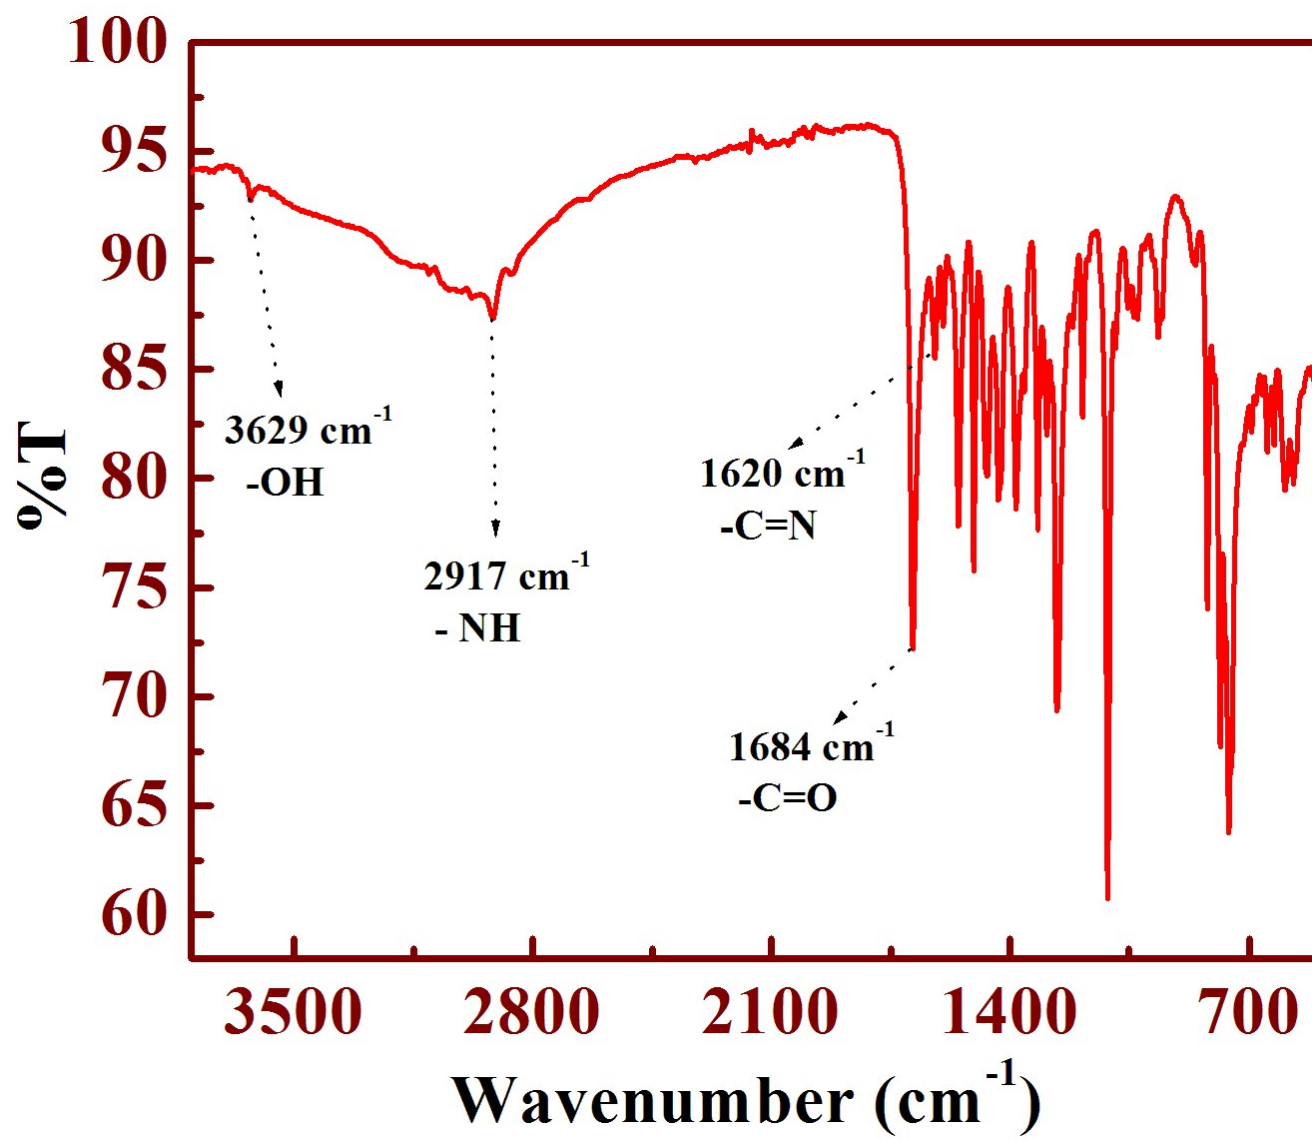

Fig. S6. IR spectrum of ligand 8Q-NH-Pyz.



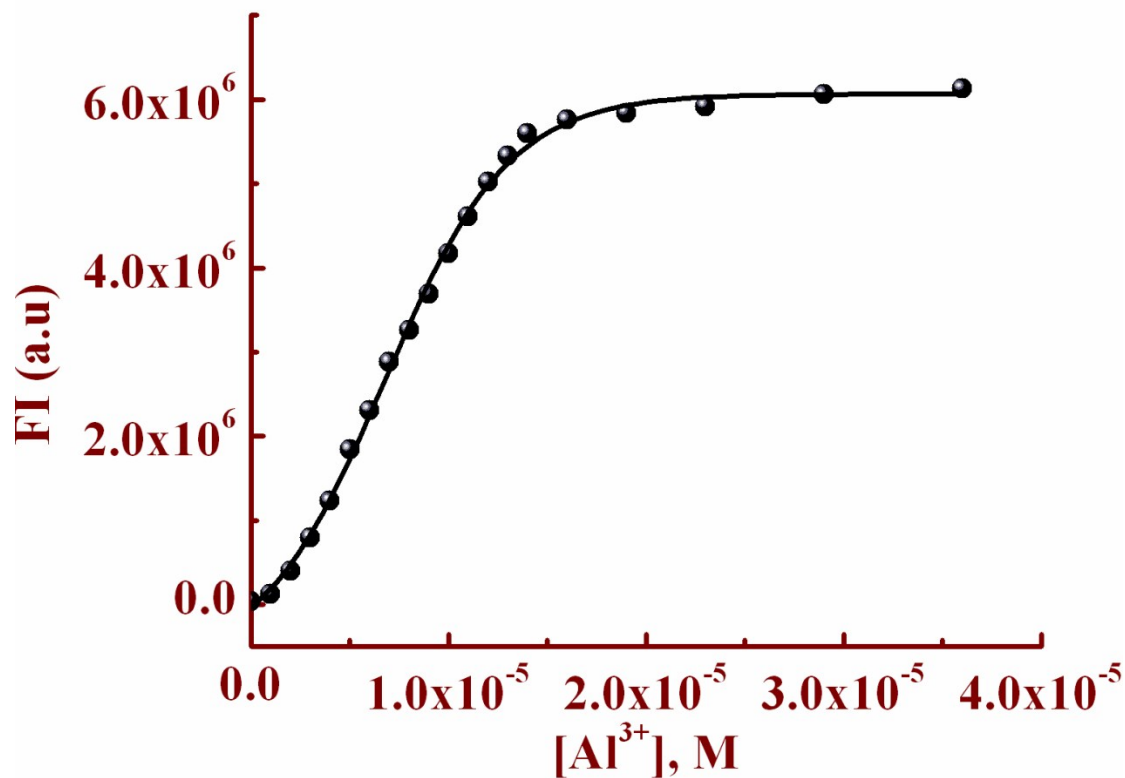

**Fig.S7.** Plot of F.I vs [Al<sup>3+</sup>], M.

### Calculation of LOD value

To determine the detection limit, fluorescence titration of **8Q-NH-Pyz** with Al<sup>3+</sup> was carried out by adding aliquots of micromolar concentration of Al<sup>3+</sup>.

However, the detection limit (LOD) of Al<sup>3+</sup> have been calculated by 3 $\sigma$  method.

$$\text{LOD} = 3 \times S_d/S$$

where S<sub>d</sub> is the standard deviation of the intercept of the blank (**8Q-NH-Pyz**) obtained from a plot of FI vs. [**8Q-NH-Pyz**], and S is the slope obtained from linear part of the plot of FI vs. [Al<sup>3+</sup>].

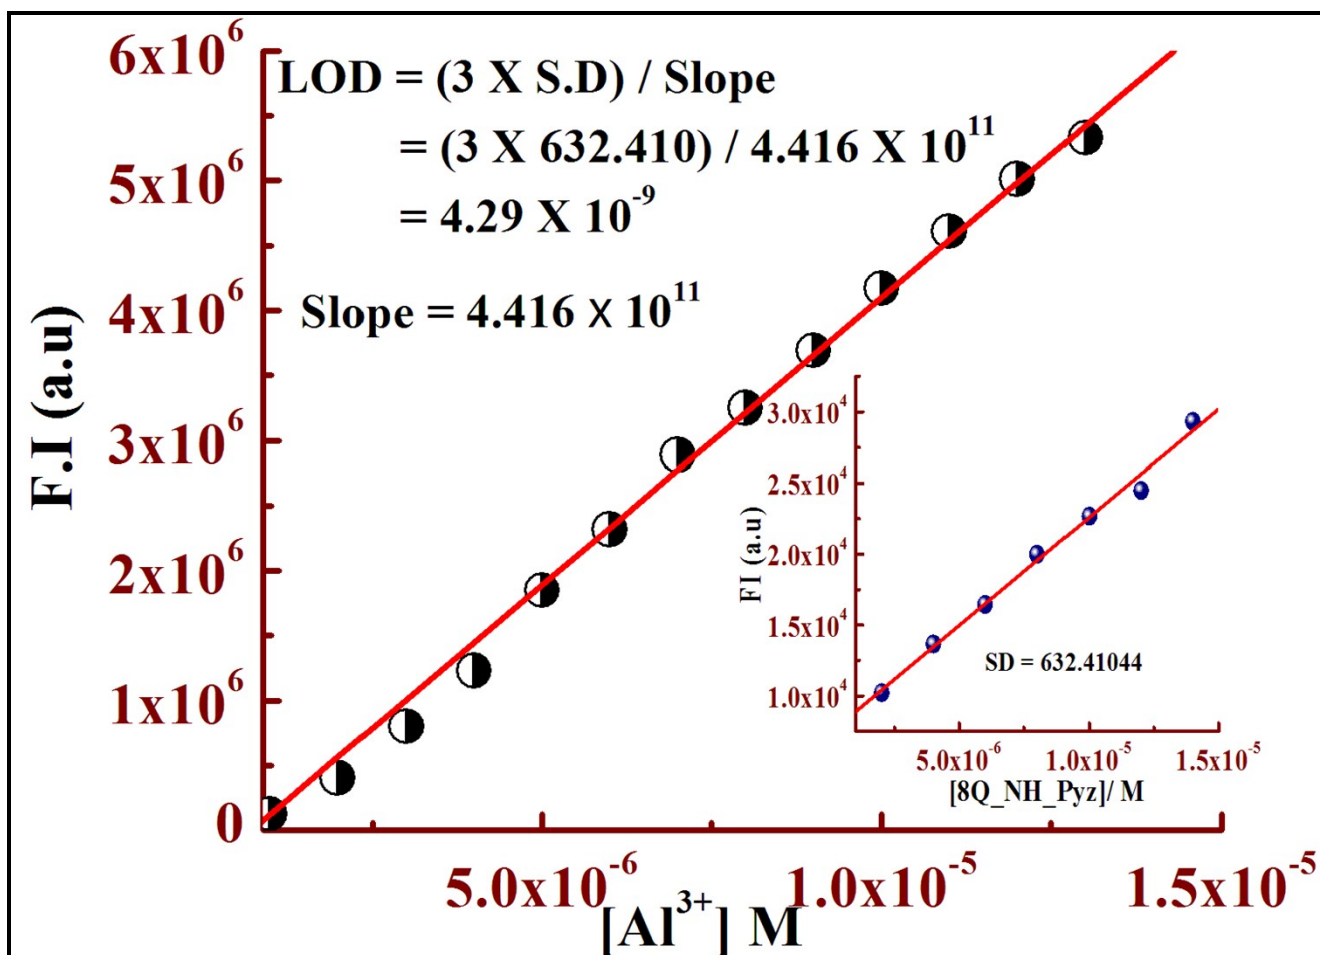

Fig.S8 LOD determination of Al<sup>3+</sup>

### JOB's Plot

This method is based on the measurement of a series of solutions in which molar concentrations of two reactants vary but their sum remains constant. The fluorescence intensity of each solution was measured at a suitable wavelength and plotted against the mole fraction of one reactant. A maximum in fluorescence intensity appeared at the mole ratio corresponding to the combining ratio of the reactants. The composition of the complex was determined by JOB's method and found to be (1:1) with respect to ligand for Al<sup>3+</sup>.

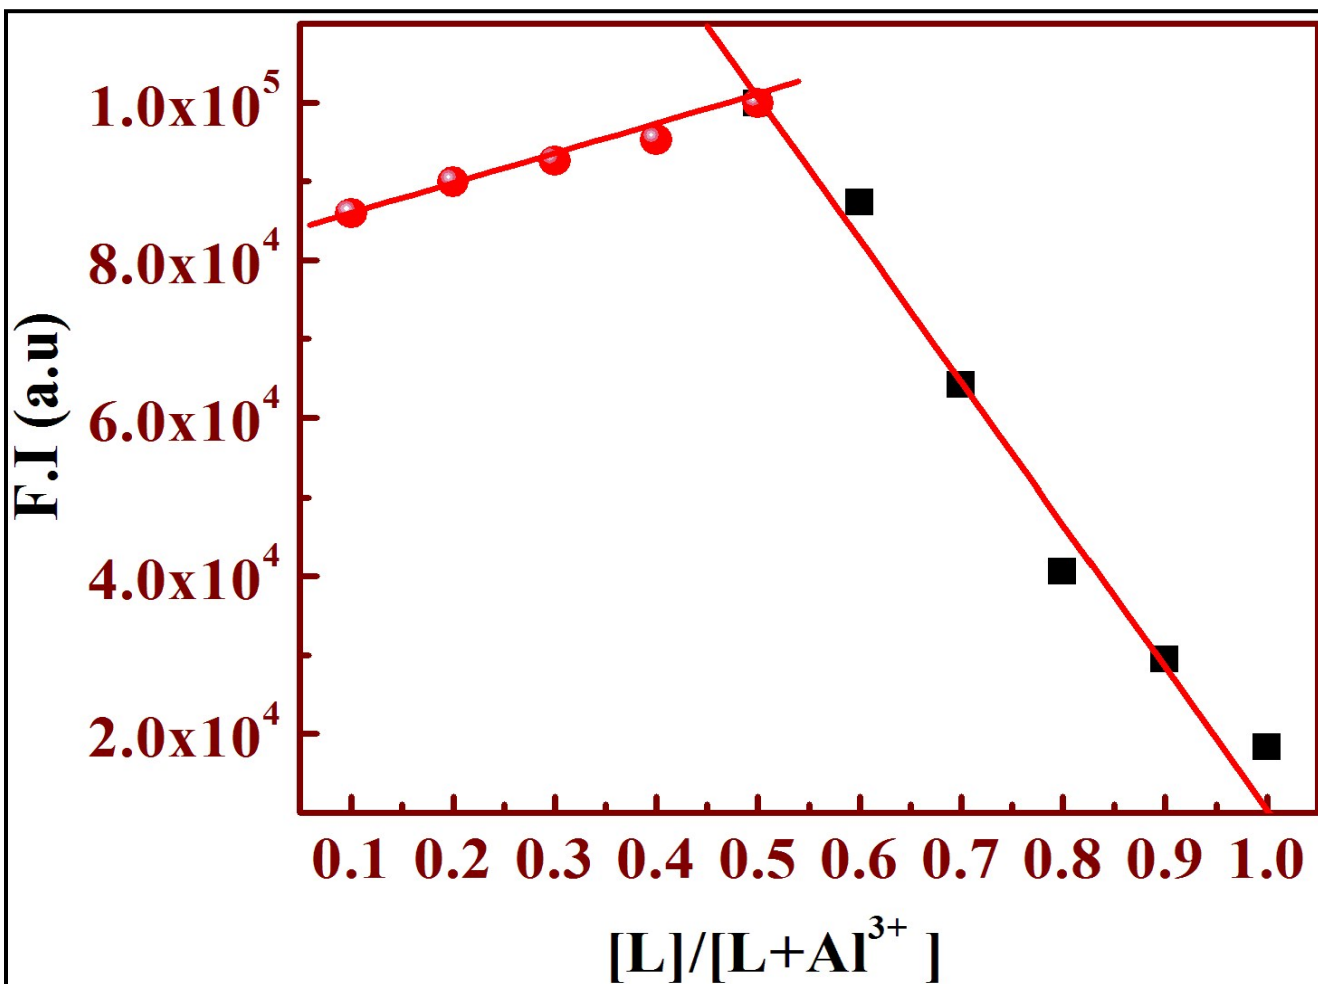

Fig.S9. JOB's plot for Al<sup>3+</sup>.

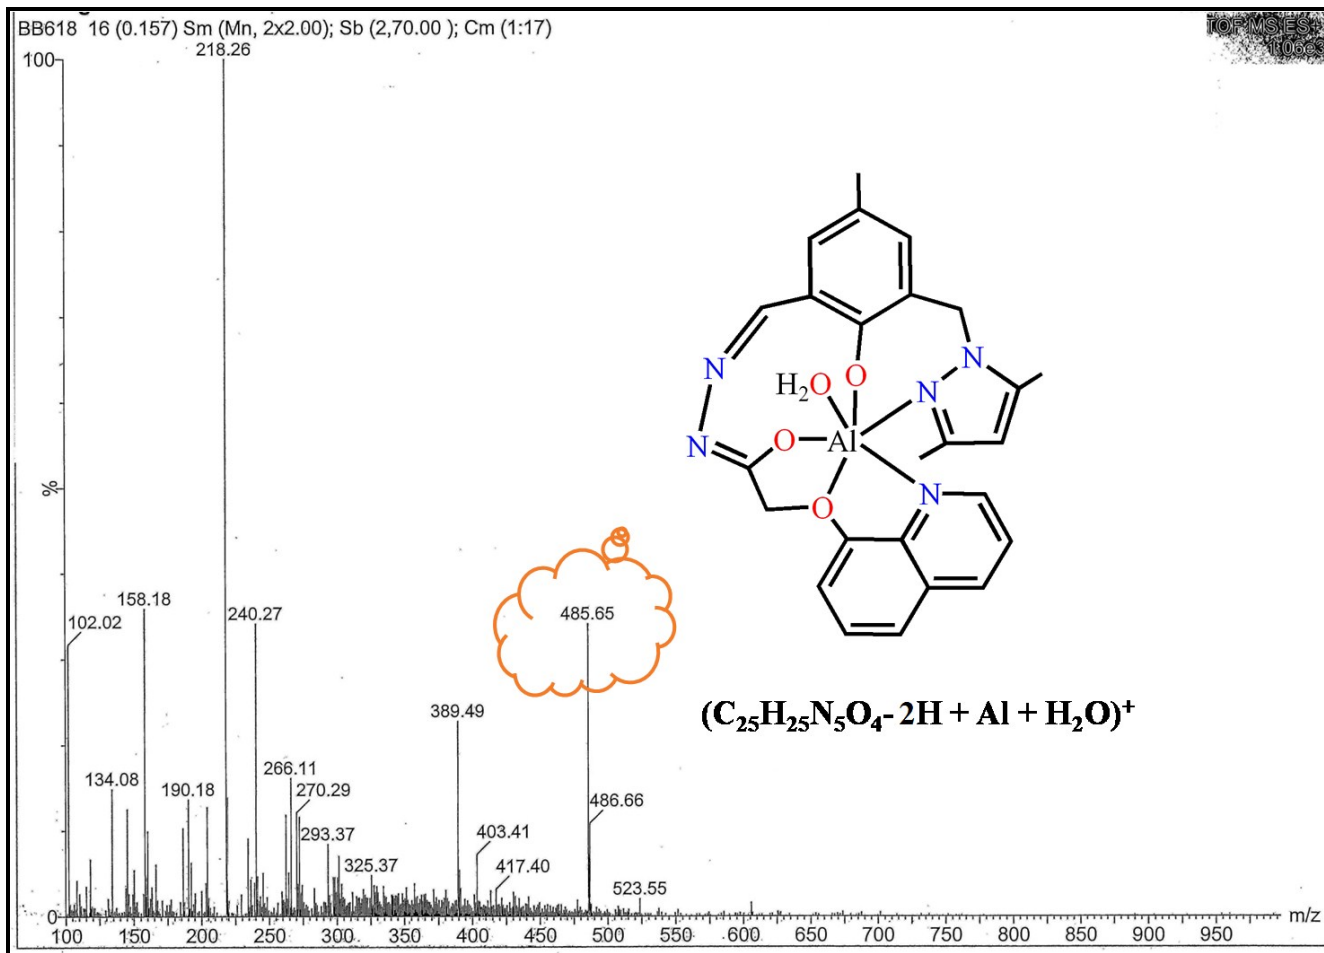

**Fig.S10.** Mass spectra of  $[(8Q-NH-Pyz) - 2H + Al + H_2O]^+$ .

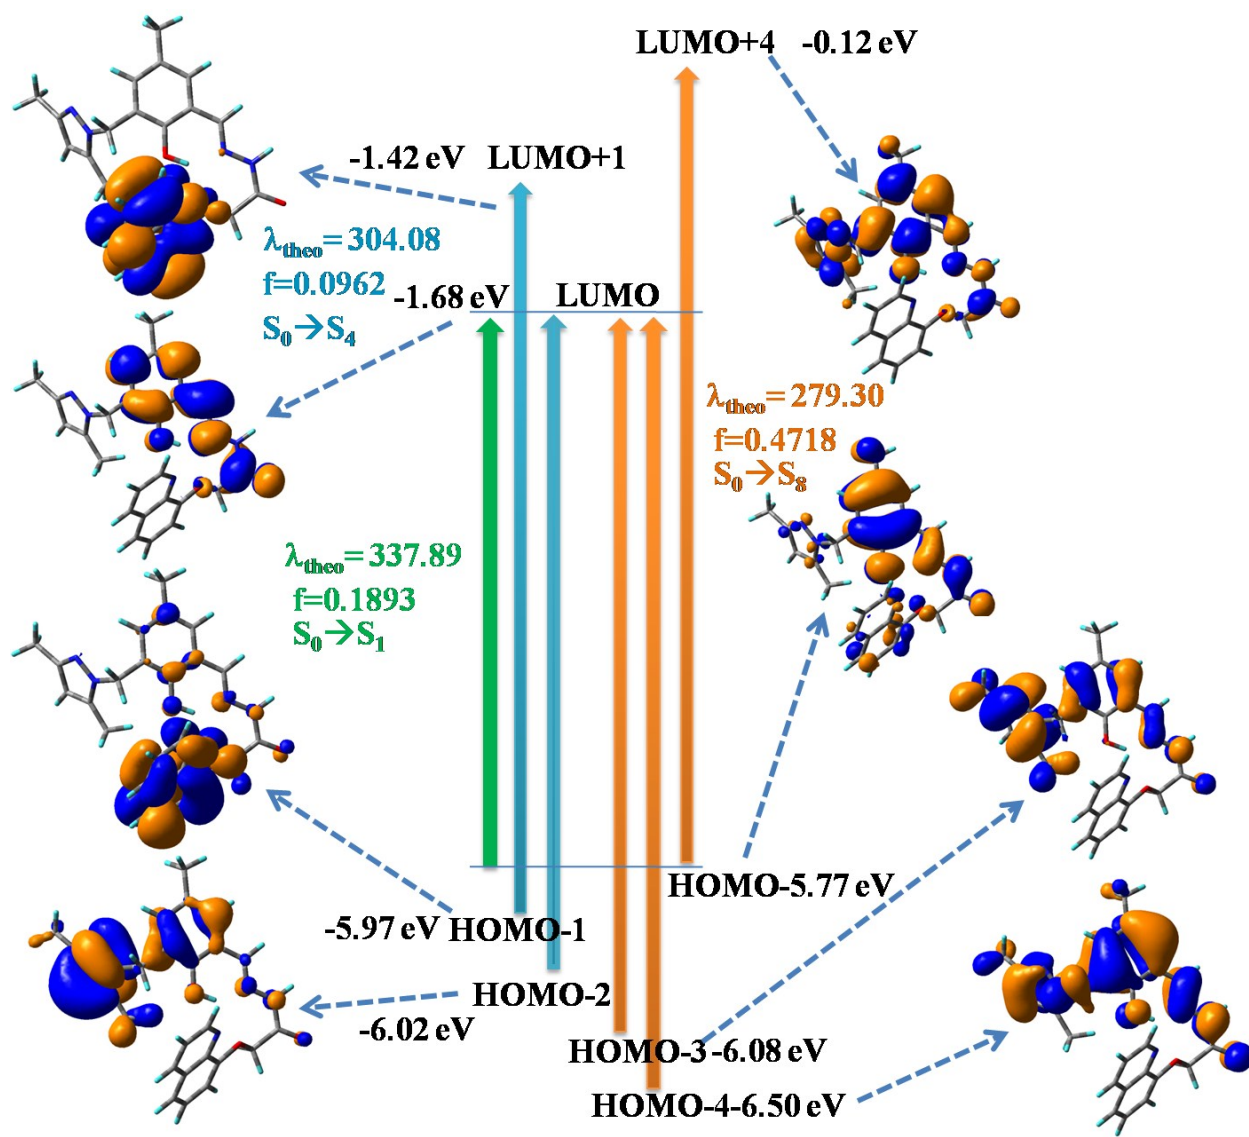

**Fig. S11.** Frontier molecular orbitals involved in the UV-Vis absorption of ligand 8Q-NH-Pyz (H<sub>2</sub>L<sup>3</sup>).

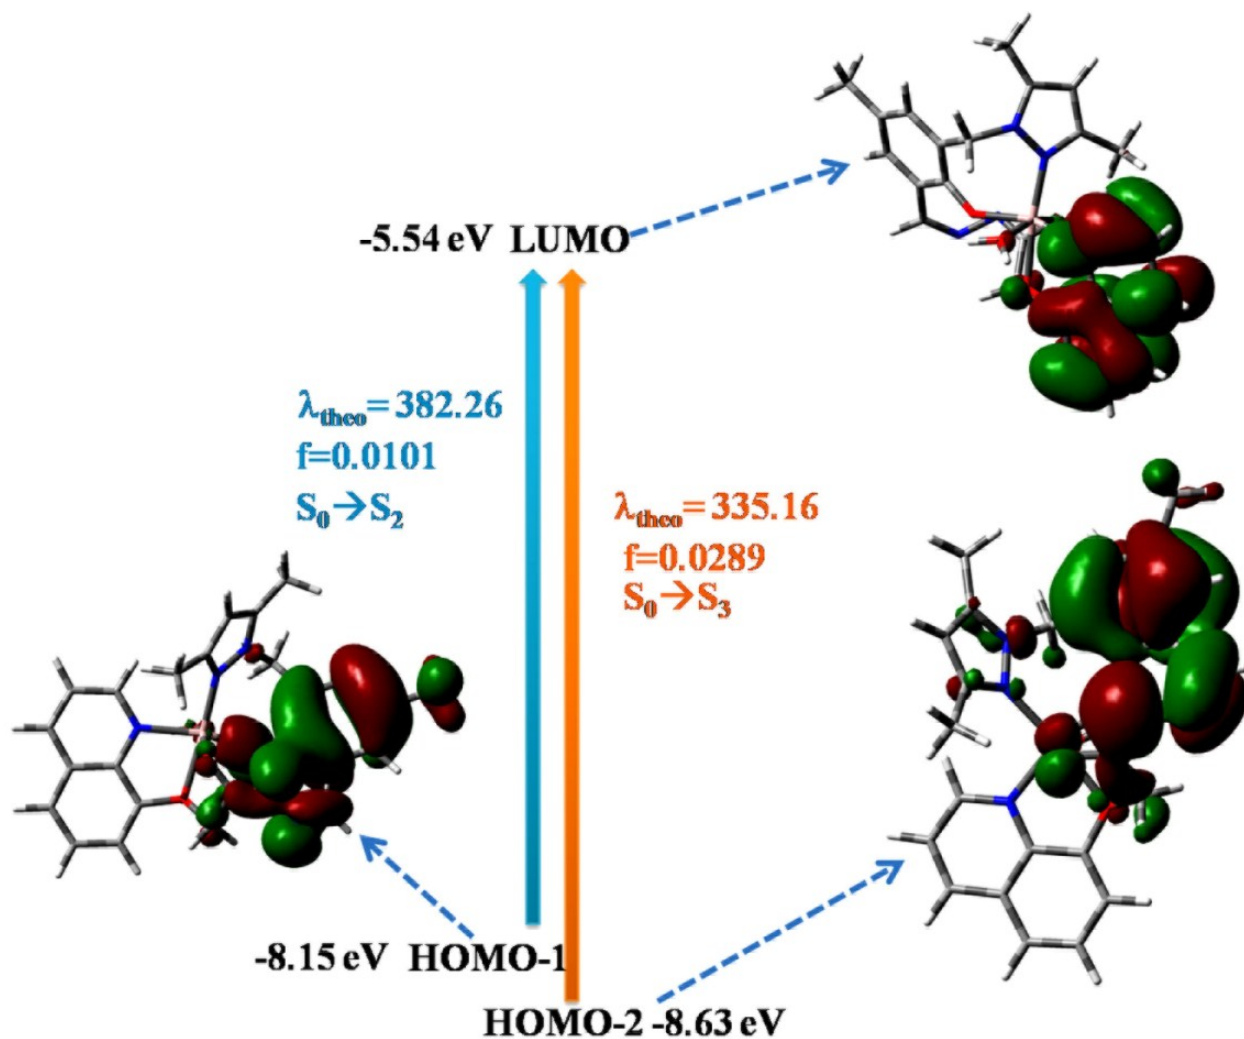

**Fig. S12.** Frontier molecular orbitals involved in the UV-Vis absorption of complex  $[\text{Al}(\text{L}^3)(\text{H}_2\text{O})]^+$ .

### Calculation of Quantum Yield:

Fluorescence quantum yields ( $\Phi$ ) were estimated by integrating the area under the fluorescence curves using the equation,

$$\Phi_{\text{sample}} = (\text{OD}_{\text{std}} \times A_{\text{sample}}) / (\text{OD}_{\text{sample}} \times A_{\text{std}}) \times \Phi_{\text{std}}$$

where  $A_{\text{sample}}$  and  $A_{\text{std}}$  are the area under the fluorescence spectral curves and  $OD_{\text{sample}}$  and  $OD_{\text{std}}$  are the optical densities of the sample and standard, respectively at the excitation wavelength. Quinesulphate has been used as the standard with  $\Phi_{\text{std}} = 0.54$  in water for measuring the quantum yields of **8Q-NH-Pyz** and of **8Q-NH-Pyz-Al<sup>3+</sup>** systems.

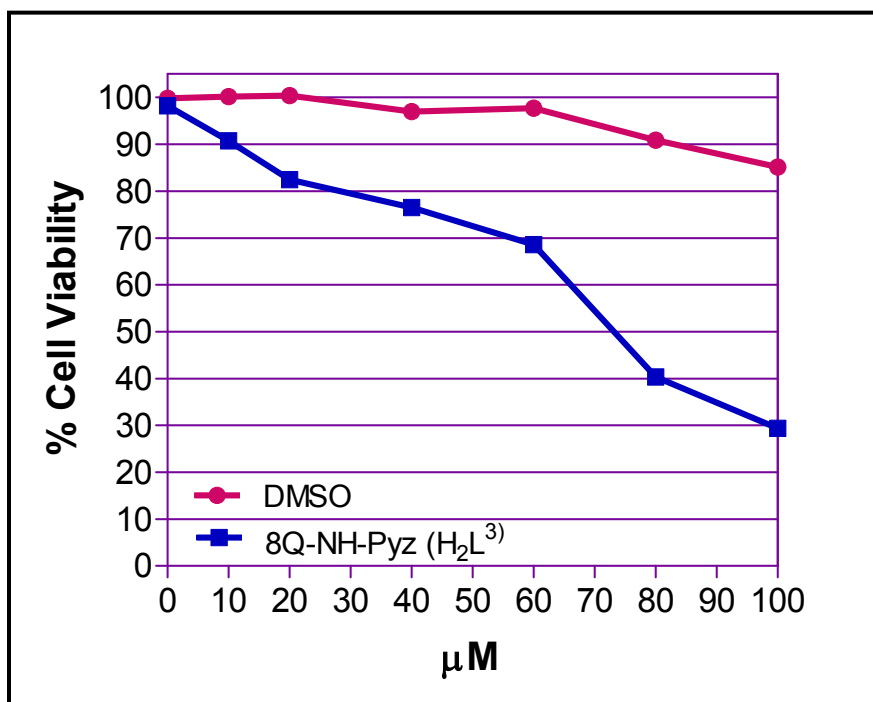

**Fig.S13.** MTT assay of ligand 8Q-NH-Pyz.

**Table S1.** List of some non-dye-based Al<sup>3+</sup> sensors

| Ligand                                                                                  | K <sub>d</sub> /K <sub>f</sub>            | Solvent                                                | LOD     | Quantum Yield | Biological study | Fold | Ref |
|-----------------------------------------------------------------------------------------|-------------------------------------------|--------------------------------------------------------|---------|---------------|------------------|------|-----|
| 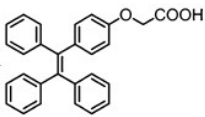       | -                                         | DMSO/H <sub>2</sub> O =<br>2:98                        | 21.6 nM | -             | Done             | -    | 1   |
| <br>I. | 5.96 × 10 <sup>3</sup><br>M <sup>-1</sup> | 20 mM HEPES,<br>1%<br>EtOH                             | 29.4 nM | 0.59          | Done             | 337  | 2   |
|      | 0.4 × 10 <sup>6</sup><br>M <sup>-1</sup>  | 1 : 1<br>(v/v) CH <sub>3</sub> CN–<br>H <sub>2</sub> O | 50 μM   | -             | Done             | 42   | 3   |
|      | 3.61 × 10 <sup>9</sup><br>M <sup>-1</sup> | MeOH : H <sub>2</sub> O (99 :<br>1, v/v)               | 0.7 mM  | 0.106         | -                | 153  | 4   |
|      | 0.35<br>× 10 <sup>5</sup> M <sup>-1</sup> | DMSO/water:<br>1/100                                   | 60 μM   | 0.29          | Done             | 11   | 5   |



|                                                                                     |                                               |                                                                        |                            |      |      |     |    |
|-------------------------------------------------------------------------------------|-----------------------------------------------|------------------------------------------------------------------------|----------------------------|------|------|-----|----|
| 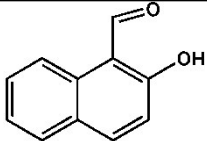   | $8.32 \times 10^6$<br>$M^{-1}$                | EtOH/H <sub>2</sub> O (95 :<br>5, v/v)                                 | 3.28 $\mu$ M               | -    | -    | 12  | 6  |
|    | $5.23 \times 10^5$<br>$M^{-1}$                | EtOH-H <sub>2</sub> O (95 : 5<br>v/v)                                  | 0.89 $\mu$ M               | 0.11 | -    | 250 | 7  |
|    | $5.6 \times 10^4$<br>$M^{-1}$                 | Ethanol                                                                | 0.72 $\mu$ M               | -    | -    | 220 | 8  |
|   | $2.5 \times 10^3$<br>$M^{-1}$                 | 50 mM Bis-Tris<br>buffer                                               | -                          | -    | Done | 100 | 9  |
|  | log $\beta$ )<br>is<br>deduced to<br>be 8.012 | 10% (v/v)<br>methanol aqueous<br>medium<br>(acetate buffer,<br>pH 4.5) | below $10^{-7}$<br>M       | -    | -    | 30  | 10 |
|  | $8.84 \times 10^3$<br>$M^{-1}$                | H <sub>2</sub> O/EtOH (1:1,<br>v/v).                                   | 0.50 $\mu$ M               | -    | -    | 110 | 11 |
|  | log Ka)<br>determine<br>d to be 9.2           | DMF                                                                    | least down<br>to 1 $\mu$ M | -    | -    | -   | 12 |

|                                                                                                                                                                                      |                                   |                                                          |                                          |        |      |     |    |
|--------------------------------------------------------------------------------------------------------------------------------------------------------------------------------------|-----------------------------------|----------------------------------------------------------|------------------------------------------|--------|------|-----|----|
| 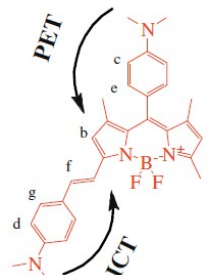                                                                                                    | $1.6 \times 10^{-3}$              | 6% HEPES in acetonitrile, v/v                            | 80 $\mu\text{M}$                         | -      | Done | -   | 13 |
|                                                                                                     | $8.46 \times 10^5 \text{ M}^{-1}$ | (50% $\text{H}_2\text{O}/\text{THF}$ v/v)                | 22 nM                                    | 0.07   | Done | 6   | 14 |
|                                                                                                    | $1.26 \times 10^3 \text{ M}^{-1}$ | $\text{MeCN}-\text{H}_2\text{O}$ (v/v,1/1)               | 9.82 $\mu\text{M}$                       | -      | -    | 230 | 15 |
|  <p>2-(4-phenyl-1,3-thiazol-2-yliminomethyl)phenol<br/>(I<sub>1</sub>)</p> <p>(I<sub>2</sub>)</p> | -                                 | Methanol                                                 | 1.0 $\mu\text{M}$ and 0.75 $\mu\text{M}$ | -      | -    | 50  | 16 |
|                                                                                                   | -                                 | $\text{MeOH}-\text{H}_2\text{O}$ (95 : 5, v/v).          | -                                        | 0.0154 | -    | 17  | 17 |
|                                                                                                   | $7.0 \times 10^3 \text{ M}^{-1}$  | $\text{CH}_3\text{CN}-\text{H}_2\text{O}$ (50 : 50, v/v) | 0.42 $\mu\text{M}$                       | -      | Done | -   | 18 |

|                                                                                                                                                                                       |                                                               |                                                      |                        |       |      |     |    |
|---------------------------------------------------------------------------------------------------------------------------------------------------------------------------------------|---------------------------------------------------------------|------------------------------------------------------|------------------------|-------|------|-----|----|
| 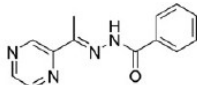                                                                                                     | $1.24 \times 10^7$<br>$M^{-1}$                                | EtOH                                                 | 0.1 $\mu$ M            | -     | -    | 800 | 19 |
|                                                                                                      | $5.02 \times 10^4$<br>$M^{-1}$                                | MeCN-H <sub>2</sub> O (9 :<br>1, v/v)                | 6.03 $\mu$ M           | -     | -    | 154 | 20 |
|                                                                                                                                                                                       | $5.1 \times 10^3$<br>$M^{-1}$                                 | DMF-H <sub>2</sub> O<br>HEPES buffer (7 :<br>3, v/v) | 5 $\mu$ M              | -     | -    | 10  | 21 |
|                                                                                                     | $9.91 \times 10^3$<br>$M^{-1}$                                | THF-H <sub>2</sub> O HEPES<br>buffer (7 : 1, v/v)    | 3 $\mu$ M              | -     | -    | -   | 22 |
| <br><small>((E)-3-((E)-2-hydroxybenzylideneamino<br/>phenylimino)methyl)phenol</small><br><b>1</b> | $1.41 \times 10^4$<br>and $1.59 \times$<br>$10^4$<br>$M^{-1}$ | MeOH                                                 | 47.9 nM and<br>82.8 nM | -     | -    | -   | 23 |
| <br><b>2</b>                                                                                       | $5.29 \times$<br>$10^4$<br>$M^{-1}$                           | MeOH-H <sub>2</sub> O (8 :<br>2, v/v)                | 7.55 mM                | 0.011 | Done | -   | 24 |

|                                                                                     |                                                     |                                          |                                 |      |      |     |           |
|-------------------------------------------------------------------------------------|-----------------------------------------------------|------------------------------------------|---------------------------------|------|------|-----|-----------|
| 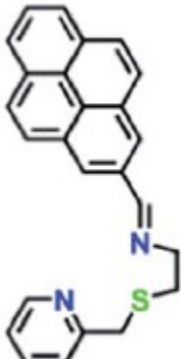   | $2.55 \times 10^4 \text{ M}^{-1}$                   | MeOH-H <sub>2</sub> O (9 : 1, v/v)       | 15 nM                           | -    | Done | 7.4 | 25        |
|    | $4.87 \times 10^4 \text{ M}^{-1}$                   | EtOH/H <sub>2</sub> O (1:9, v/v, pH 5.3) | 36.6 nM.                        | 0.45 | Done | -   | 26        |
|    | (log K <sub>a</sub> )<br>3.94                       | in CH <sub>3</sub> CN                    | -                               | -    | -    | -   | 27        |
|  | log K <sub>a</sub><br>13.04                         | 1% CH <sub>3</sub> CN Water              | at least down to 10 μM          | -    | -    | -   | 28        |
|  | $2.10 \times 10^2 \text{ M}^{-1}$                   | ACN:H <sub>2</sub> O (1:9)               | $1.08 \times 10^{-6} \text{ M}$ |      | Done | -   | 29        |
|  | K <sub>d</sub> =<br>$1.76 \times 10^{-5} \text{ M}$ | In 10mM HEPES buffer                     | 4.29 nM                         | 0.28 | Done | 157 | This Work |

**Table S2.** List of some selected bond lengths of 8Q-NH-Pyz in the ground state calculated at B3LYP Levels.

| Bond Lengths (Å) |        |              |       |
|------------------|--------|--------------|-------|
| Al42-N37         | 1.994  | Al42-O34     | 1.850 |
| Al42-N16         | 2.050  | Al42-O23     | 1.879 |
| Al42-O17         | 2.184  | Al-O57w      | 2.030 |
| Bond Angles (°)  |        |              |       |
| O57-Al42-O23     | 159.74 | O34-Al42-O17 | 87.22 |
| N37-Al42-O17     | 171.66 | O17-Al42-N16 | 78.30 |
| O57-Al42-N37     | 103.26 | N16-Al42-N37 | 98.57 |
| O17-Al42-O23     | 75.92  | O34-Al42-N37 | 98.36 |
| O57-Al42-O17     | 84.11  |              |       |

**Table S3.** Some selected geometrical parameters for  $[Al(L^3)(H_2O)]^+$  (1) complex in the ground state calculated at B3LYP Levels.

| Al42-N37        | 1.994  | Al42-O34     | 1.850 |
|-----------------|--------|--------------|-------|
| Al42-N16        | 2.050  | Al42-O23     | 1.879 |
| Al42-O17        | 2.184  | Al-O57w      | 2.030 |
| Bond Angles (°) |        |              |       |
| O57-Al42-O23    | 159.74 | O34-Al42-O17 | 87.22 |
| N37-Al42-O17    | 171.66 | O17-Al42-N16 | 78.30 |
| O57-Al42-N37    | 103.26 | N16-Al42-N37 | 98.57 |
| O17-Al42-O23    | 75.92  | O34-Al42-N37 | 98.36 |
| O57-Al42-O17    | 84.11  |              |       |

**Table S4.** Vertical excitation energies and oscillator strengths ( $f_{\text{cal}}$ ) of some low-lying excited singlet states obtained from TDDFT// B3LYP/6-31+G calculations of 8Q-NH-Pyz.

| Electronic transition | Composition       | Excitation energy     | Oscillator strength( $f_{\text{cal}}$ ) | CI      | $\lambda_{\text{exp}}$ (nm) |
|-----------------------|-------------------|-----------------------|-----------------------------------------|---------|-----------------------------|
| $S_0 \rightarrow S_1$ | HOMO→<br>LUMO     | 3.6694 eV(338 nm)     | 0.1893                                  | 0.67888 | 336                         |
| $S_0 \rightarrow S_4$ | HOMO-1→<br>LUMO+1 | 4.0773 eV<br>(304 nm) | 0.0962                                  | 0.68059 | 300                         |
|                       | HOMO-2→<br>LUMO   |                       |                                         | 0.11597 |                             |
| $S_0 \rightarrow S_8$ | HOMO→<br>LUMO + 4 | 4.4392 eV(279nm)      | 0.4718                                  | 0.10251 | 288                         |
|                       | HOMO-3→<br>LUMO   |                       |                                         | 0.17038 |                             |
|                       | HOMO-4→<br>LUMO   |                       |                                         | 0.63802 |                             |

**Table S5.** Vertical excitation energies and oscillator strengths ( $f_{\text{cal}}$ ) of some low-lying excited singlets obtained from TDDFT// B3LYP/6-31+G calculations of 8Q-NH-Pyz-Al<sup>3+</sup> complex (1).

| Electronic transition | Composition                    | Excitation energy    | Oscillator strength ( $f$ ) | CI      | $\lambda_{\text{exp}}$ (nm) |
|-----------------------|--------------------------------|----------------------|-----------------------------|---------|-----------------------------|
| $S_0 \rightarrow S_2$ | HOMO - 1 $\rightarrow$<br>LUMO | 3.24 eV (382.26 nm)  | 0.0101                      | 0.70274 | 380                         |
| $S_0 \rightarrow S_3$ | HOMO - 2 $\rightarrow$<br>LUMO | 3.6992 eV(335.16 nm) | 0.0289                      | 0.68281 | 337                         |

## References

1. S. Gui, Y. Huang, F. Hu, Y. Jin, G. Zhang, L. Yan, D. Zhang and R. Zhao, *Anal. Chem.* 2015, **87**, 1470.
2. C. Liang, W. Bu, C. Li, G. Men, M. Deng, Y. Jiangyao, H. Sunb, and S. Jiang, *Dalton Trans.*, 2015, **44**, 11352.
3. J. Kumar, M. J.Sarma, P. Phukan and D. K. Das, *Dalton Trans.*, 2015, **44**, 4576.
4. S. M. Hossain, A. Lakma, R. N. Pradhan, A. Chakraborty, A. Biswas, A. K. Singh, *RSC Adv.*, 2015, **5**, 63338.
5. S. Sen, T. Mukherjee, B. Chattopadhyay, A. Moirangthem, A. Basu, J. Marekd and P. Chattopadhyay, *Analyst*, 2012, **137**, 3975.
6. Y. W. Liu, C. H. Chen and A. T Wu, *Analyst*, 2012, **137**, 5201.
7. C. H. Chen, D. J. Liao, C. F. Wan and A. T. Wu, *Analyst*, 2013, **138**, 2527.
8. J. C. Qin, Z. Y. Yang, L. Fan, X. Y.Cheng, T. R. Li and B. D. Wang, *Anal. Methods.*, 2014, **6**, 7343.
9. S. Kim, J. Y. Noh, S. J. Park, Y. J. Na, I. H. Hwang, J. Min, C. Kim and J. Kim, *RSC Adv.*, 2014, **4**, 18094.
10. X. H. Jiang , B. D.Wang, Z. Y. Yang, Y. C. Liu, T. R. Li and Z. C. Liu, *Inorg. Chem. Commun.*, 2011, **14**, 1224.
11. Y. Lu, S. Huang, Y. Liu, S. He, L. Zhao and X. Zeng, *Org. Lett.*, 2011, **13**, 5274.
12. H. M. Park, B. N.Oh, J. H. Kim, W. Qiong, I. H. Hwang , K. D. Jung, C. Kim and J. Kim, *Tet. Letters.*, 2011, **52**, 5581.
13. Y. W. Wanga, M. X.Yu, Y. H. Yu, Z. P. Bai, Z. Shen, F. Y.Li and X. Z. You, *Tet. Letters.*, 2009, **50**, 6169.
14. R. Ali, S. S. Razi, P. Srivastava, M. Shahid and A. Misra, *RSC Adv.*, 2015, **5**, 61513.
15. S. Erdemir and S. Malkondu, *J. Lumin.*, **2015**, *158*, 401.
16. V. K. Gupta, A. K. Singh and L. K. Kumawat, *Sens. Actuators B.*, 2014, **195**, 98.
17. T. Li, R. Fang, B. Wang, Y. Shao, J. Liu, S. Zhang and Z. Yang, *Dalton Trans.*, 2014, **43**, 2741.
18. R. Patil, A. Moirangthem, R. Butcher, N. Singh, A. Basu, K. Tayade, U. Fegade, D. Hundiware, and A. Kuwar, *Dalton Trans.*, 2014, **43**, 2895.



19. Z. C. Liao, Z. Y. Yang, Y. Li, B. D. Wang and Q. X. Zhou, *Dyes and Pigments*, 2013, **97**, 124.
20. Y. J. Lee, C. Lima, H. Suha, E. J. Song and C. Kima, *Sens. Actuators B.*, 2014, **201**, 535.
21. K. Kaur, V. K. Bhardwaj, N. Kaur and N. Singh, *Inorg. Chem. Commun.*, 2012, **18**, 79.
22. K. Kaur, V. K. Bhardwaj, N. Kaur and N. Singh, *Inorg. Chem. Commun.*, 2012, **26**, 31.
23. S. K. Shoorra, A. K. Jaina and V. K. Gupta, *Sens. Actuators B.*, 2015, **216**, 86.
24. R. Alam, T. Mistri, R. Bhowmick, A. Katarkar, K. Chaudhuri and M. Ali, *RSC Adv.*, 2015, **5**, 53940.
25. R. Bhowmick, M. Dolai, R. Alam, T. Mistri, A. Katarkar, K. Chaudhuri and M. Ali, *RSC Adv.*, 2014, **4**, 41784.
26. F. Yu, L. J. Hou, L. Y. Qin, J. B. Chao, Y. Wang and W. J. Jin, *J. Photochem. Photobiol A: Chemistry*, 2016, **315**, 8–13.
27. D. Maity and T. Govindaraju, *Chem. Commun.*, 2010, **46**, 4499.
28. D. Maity and T. Govindaraju, *Chem. Commun.* 2012, **48**, 1039.
29. T. Anand, G. Sivaraman, A. Mahesh and D. Chellappa, *Anal. Chim. Acta.*, 2015, **853**, 596.
